# Supplementary material for: NOAEL cancer therapy: a tumor targetable docetaxel–inorganic polymer nanohybrid prevents drug-induced neutropenia
Source: Royal Society of Chemistry journal article supplement (doi:10.1039/d2tb02121h), 2022-10-29
Supplement: d2tb02121h1.pdf [file d2tb02121h1.pdf]

## ***Supporting information***

# **NOAEL Cancer Therapy: Tumor Targetable Docetaxel-Inorganic Polymer Nanohybrid Prevents Drug-Induced Neutropenia**

Geun-Woo Jin,<sup>a†</sup> Goeun Choi,<sup>b,c,d,†</sup> Huiyan Piao<sup>b</sup>, N. Sanoj Rejinold<sup>b</sup>, Shunsuke Asahina<sup>e</sup>, Soo-Jin Choi,<sup>f</sup> Hwa Jeong Lee,<sup>g</sup> and Jin-Ho Choy,<sup>b,h,i,j\*</sup>

<sup>a</sup>R&D Center, CnPharm Co., Ltd., Seoul 03759, Republic of Korea

<sup>b</sup>Intelligent Nanohybrid Materials Laboratory (INML), Institute of Tissue Regeneration Engineering (ITREN), Dankook University, Republic of Korea

<sup>c</sup>College of Science and Technology, Dankook University, Cheonan, Republic of Korea

<sup>d</sup>Department of Nanobiomedical Science and BK21 PLUS NBM Global Research Center for Regenerative Medicine, Dankook University, Cheonan, Republic of Korea

<sup>e</sup>JEOL Ltd. SM Business Unit, 3-1-2 Musashino, Akishima-shi, Tokyo 196-8558, Japan.

<sup>f</sup>Division of Applied Food System, Major of Food Science & Technology, Seoul Women's University, Seoul 01797, Republic of Korea

<sup>g</sup>Graduate School of Pharmaceutical Sciences, Ewha Womans University, 52 Ewhayeodae-gil, Seodaemun-gu, Seoul, 03760, Republic of Korea

<sup>h</sup>Division of Natural Sciences, the National Academy of Sciences, Seoul, Republic of Korea

<sup>i</sup>Department of Pre-medical Course, College of Medicine, Dankook University, Cheonan, Republic of Korea

<sup>j</sup>International Research Frontier Initiative (IRFI), Institute of Innovative Research, Tokyo Institute of Technology, Yokohama 226-8503, Japan

\*Corresponding author. E-mail: [jhchoy@dankook.ac.kr](mailto:jhchoy@dankook.ac.kr)

† These authors contributed equally to this work.

## Supporting information

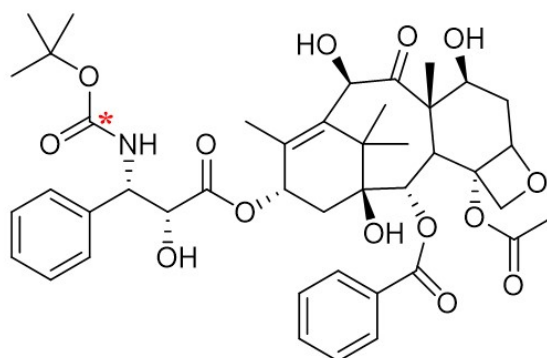

[<sup>14</sup>C]Docetaxel (DTX)

Fig. S1. Chemical structure of <sup>14</sup>C-labeled DTX

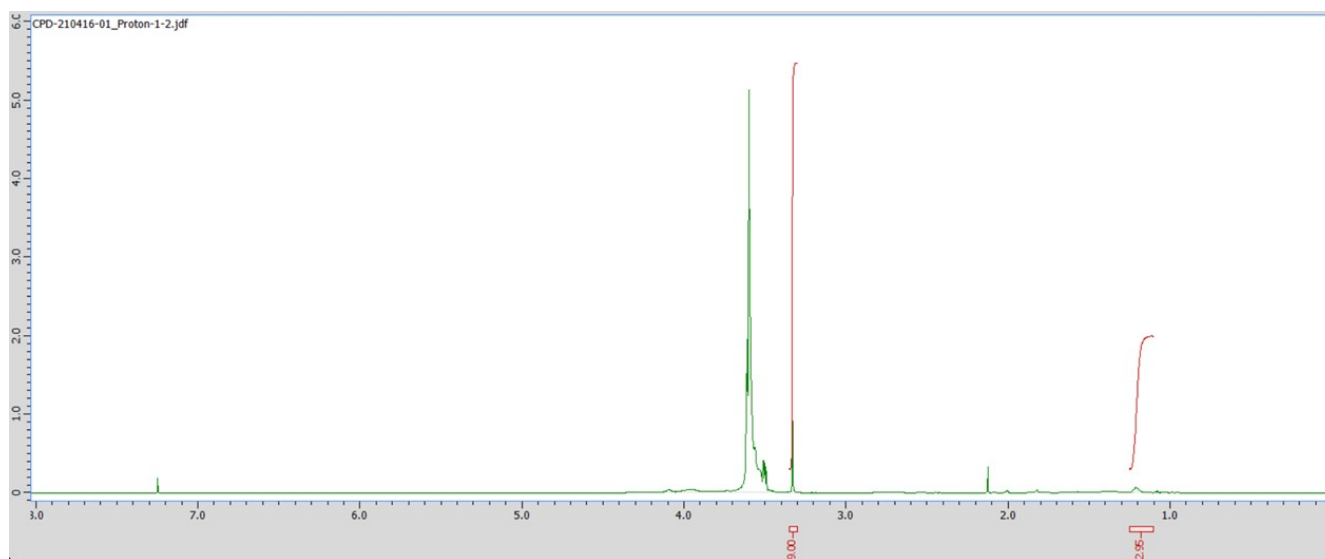

Fig. S2. <sup>1</sup>H-NMR spectrum of CP.

## Supporting information

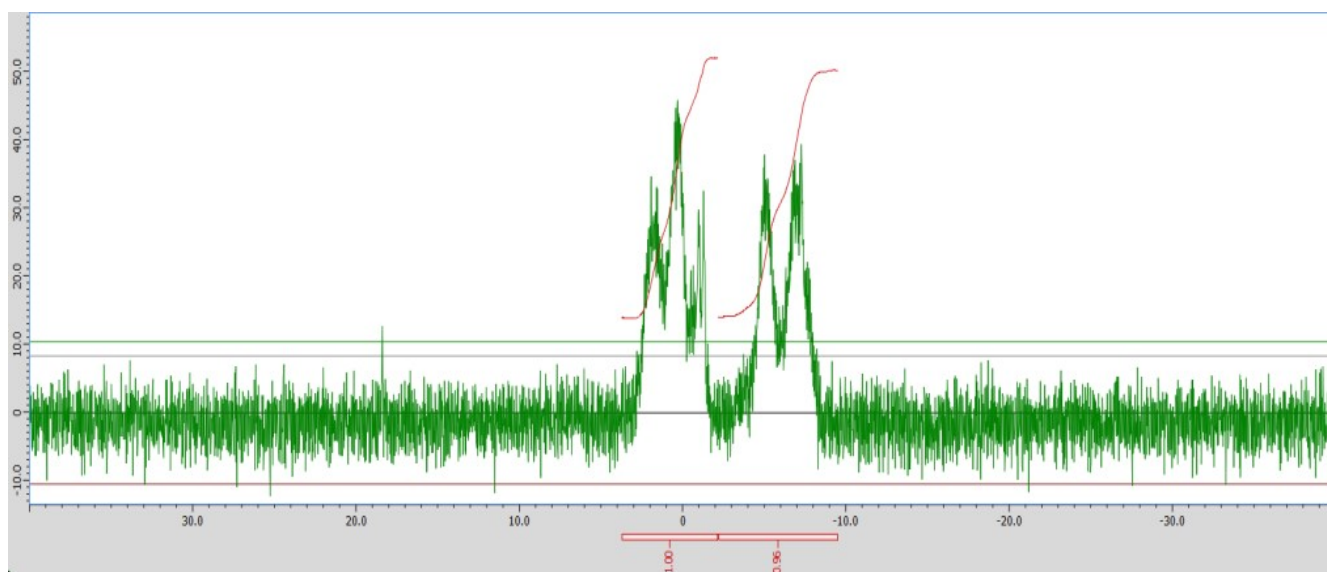

**Fig. S3.**  $^{31}\text{P}$ -NMR spectrum of CP.

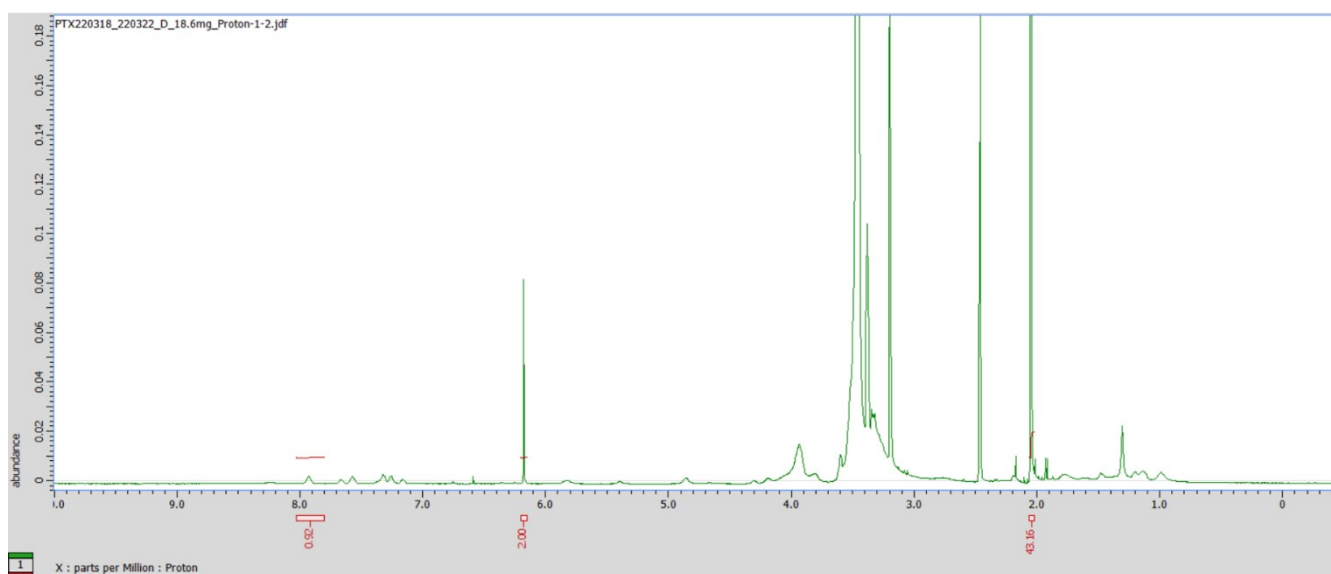

**Fig. S4.**  $^1\text{H}$ -NMR spectrum of PTX (internal standard: maleic acid).

## Supporting information

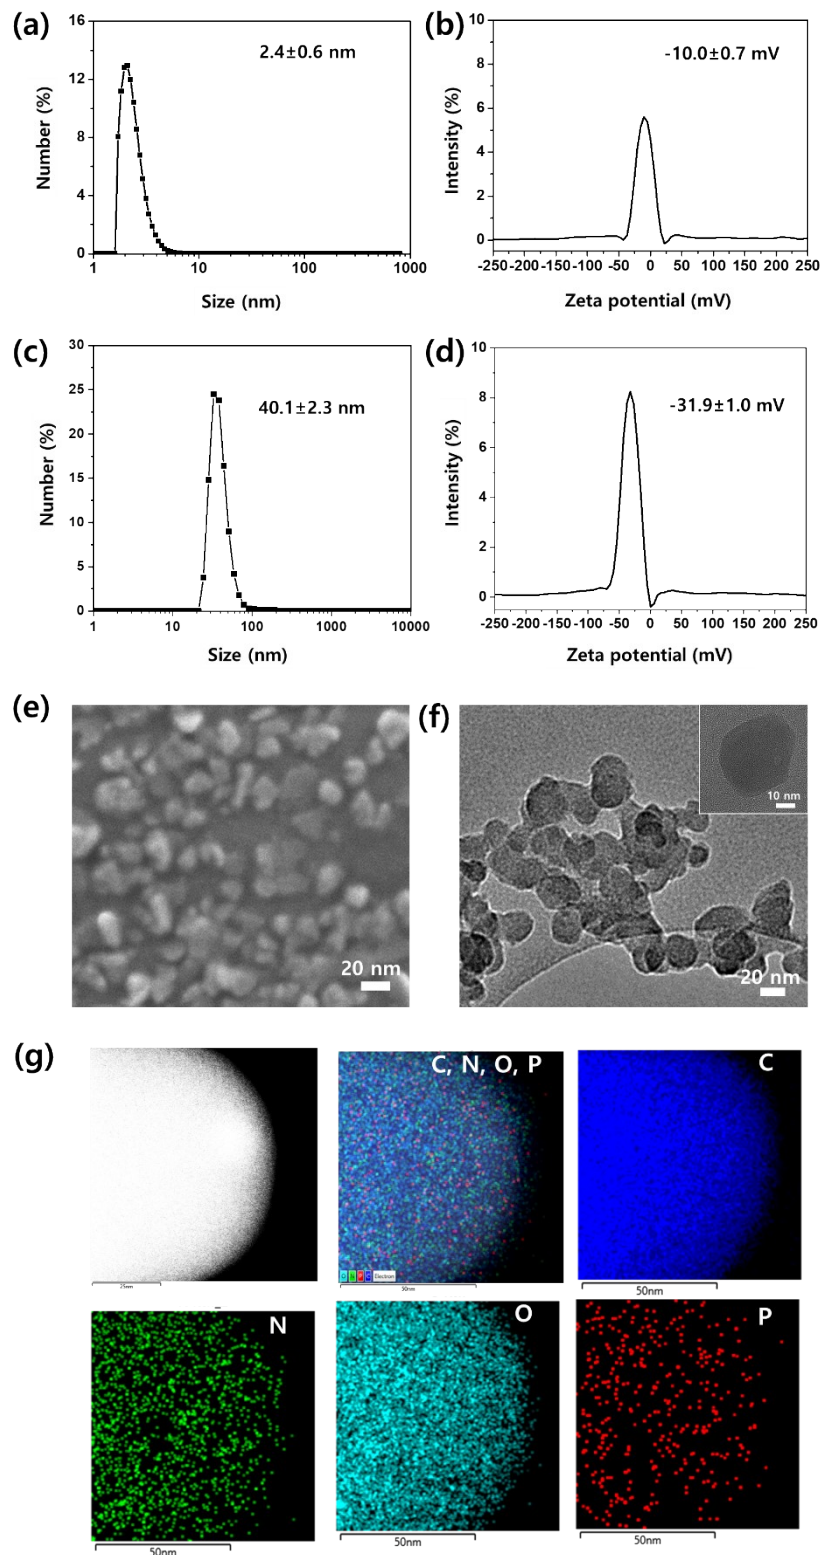

**Fig. S5.** (a) Particle size distribution and (b) zeta potential of CP, (c) Particle size distribution, (d) zeta potential, and (e) gentle beam super-high-resolution (GBSH) mode scanning electron microscopy (SEM) images of PTX. (f) Cs-HRTEM image of PTX and spherical primary particle (inset). (g) High-angle annular dark-field scanning transmission electron microscopy (HAADF-STEM) image of PTX taken for mapping analysis, and characteristic mapping results of the mixture of elements C, N, O, and P, respectively.

## Supporting information

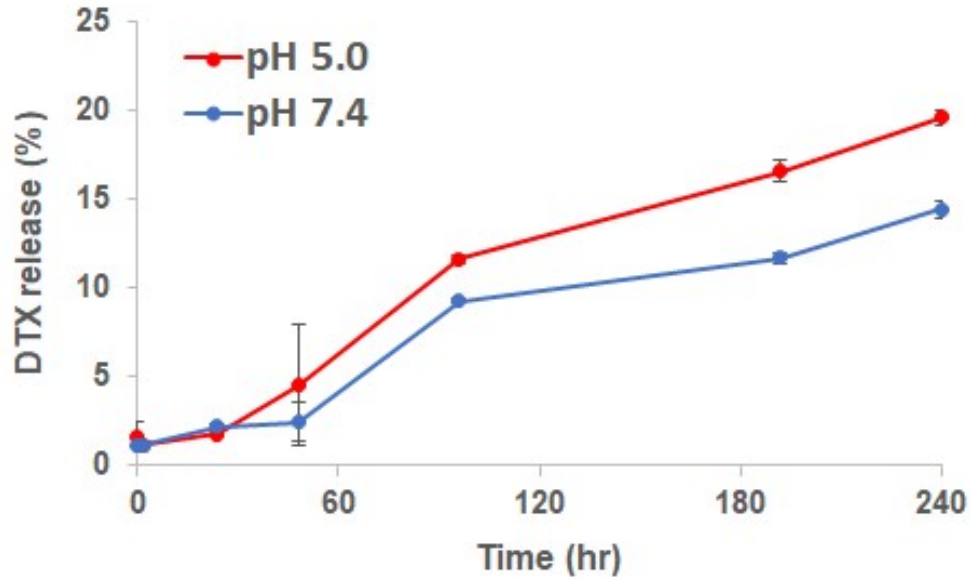

Fig. S6. *In vitro* stability study of PTX.

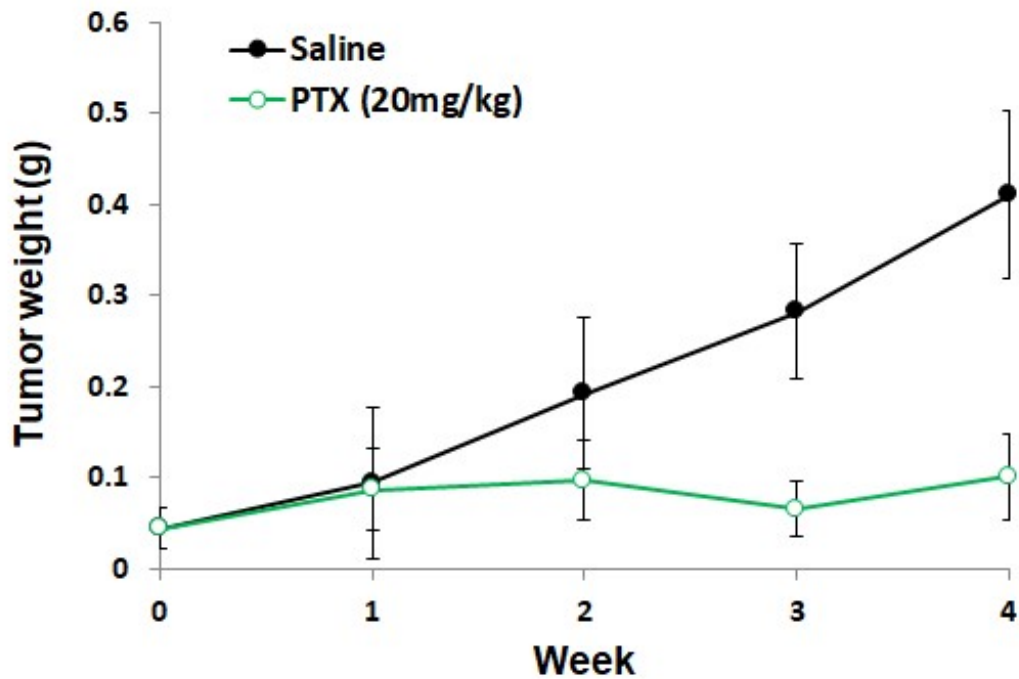

Fig. S7. The anti-tumor activity of PTX against pancreatic cancer model (PANC-1 orthotopic mouse model). (n=11)

## Supporting information

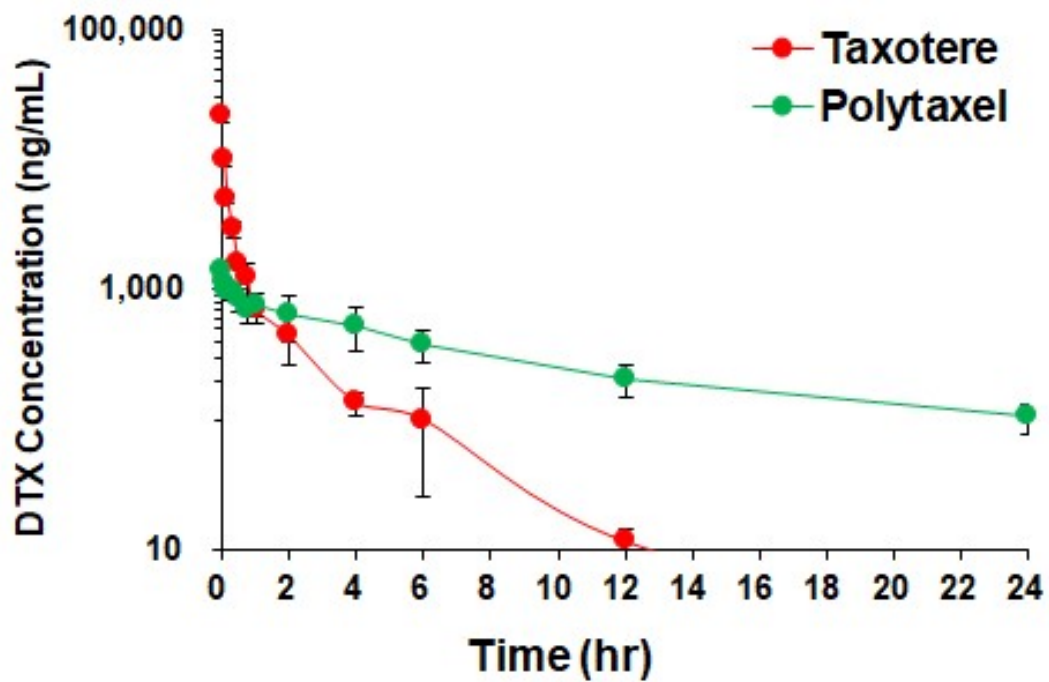

**Fig. S8.** Pharmacokinetic profile of PTX and Taxotere®.

**Table S1.** Derived PK parameters from the PK profiles of PTX and Taxotere®.

| Drug dose (mg/kg)    | AUC <sub>all</sub> (ng·hr/mL) | C <sub>max</sub> (ng/mL) | V <sub>d</sub> (mL) | CL <sub>t</sub> (mL/hr) | t <sub>1/2</sub> (hr) |
|----------------------|-------------------------------|--------------------------|---------------------|-------------------------|-----------------------|
| Taxotere® (15 mg/kg) | 4919.4                        | 21465.3                  | 14283.0             | 3043.1                  | 3.25                  |
| PTX (15 mg/kg)       | 7099.3                        | 1413.9                   | 20978.4             | 1801.4                  | 8.07                  |
